# Supplementary material
Source: publisher site journal article supplement (https://www.dovepress.com/get_supplementary_file.php?f=502086.xlsx)
Supplement: Supplementary file 1 [file get_supplementary_file.php]

## Sheet: Table_S1
Table S1. Summary of studies included in this Review.
Author/Year	Country	Study Design	Sample/Participants	Sampling Strategy	Care Setting	Study Main Objective	Main Findings
Varghese et al., 2017	India	Narrative Review	Adults with severe TBI	Not specified	Critical care units	Nursing management of adults with severe TBI	Emphasizes nursing management strategies for severe TBI.
Zrelak et al., 2020	USA	Evidence-based review	Adults with severe TBI	Not specified	Not specified	Evidence-based nursing care for severe TBI	Outlines evidence-based approaches to nursing care for severe TBI.
Oyesanya et al., 2018	USA	Qualitative Study	Nurses caring for TBI patients	Convenience sampling	Hospitals	Nurses’ concerns about caring for TBI patients	Identifies concerns nurses face when caring for TBI patients.
Nguyen et al., 2023	USA	Systematic review & meta-analysis	TBI patients	Not specified	Hospitals	Neutrophil-to-lymphocyte ratio as a predictor of TBI outcomes	Neutrophil-to-lymphocyte ratio can predict postoperative outcomes in TBI patients.
Marino et al., 2023	USA	Retrospective cohort study	TBI patients	Convenience sampling	Single institution	Neurosurgical outcomes in severe TBI	Investigates neurosurgical outcomes in severe TBI patients.
Olesen et al., 2012	Europe	Cross-sectional study	Not specified	Not specified	Not specified	Economic cost of brain disorders in Europe	The economic burden of brain disorders in Europe is significant.
Giacino et al., 2018	USA	Systematic Review	Patients with disorders of consciousness	Not specified	Hospitals	Guidelines for diagnosis and management of disorders of consciousness	Provides guidelines for managing disorders of consciousness.
Carlson & Lin, 2023	USA	Review	Not specified	Not specified	Not specified	Prognostication in prolonged disorders of consciousness	Focuses on prognosis in prolonged disorders of consciousness.
Aloi et al., 2021	UK	Narrative Review	Patients with disorders of consciousness	Not specified	Rehabilitation settings	Use of transcranial direct current stimulation for rehabilitation	Discusses therapeutic use of transcranial direct current stimulation for DOC patients.
Delargy et al., 2019	Ireland	Retrospective study	DOC patients	Not specified	Rehabilitation centers	Use of Zolpidem and interdisciplinary team approach in DOC	Examines the use of Zolpidem and an interdisciplinary approach in DOC patients.
Kondziella et al., 2020	Europe	Guidelines	Not specified	Not specified	Not specified	Diagnosis of coma and disorders of consciousness	Provides diagnostic criteria and guidelines for coma and DOC.
Schnakers et al., 2009	Belgium	Cross-sectional study	Patients with DOC	Not specified	Hospitals	Diagnostic accuracy in DOC	Evaluates the accuracy of clinical consensus versus neurobehavioral assessment.
Wang et al., 2020	China	Cross-sectional study	DOC patients	Not specified	Hospitals	Misdiagnosis in prolonged DOC	Misdiagnosis of DOC using clinical consensus compared with coma-recovery scale.
Haddad et al., 2019	UK	Systematic review	Minimally conscious patients	Not specified	Hospitals	Deep brain stimulation for DOC patients	Reviews deep brain stimulation as a treatment for DOC patients.
Wilde et al., 2022	USA	Review	TBI patients	Not specified	Hospitals	Biomarker development for TBI diagnosis and treatment	Reviews biomarker development for TBI diagnosis and treatment.
Mosilhy et al., 2022	Egypt	Narrative review	Patients with neurological disorders	Not specified	Hospitals	Non-invasive brain modulation for neurological disorders	Discusses non-invasive brain modulation techniques for neurological conditions.
Chen et al., 2024	China	Review	Patients with cognitive impairments	Not specified	Not specified	Advances in non-invasive neuromodulation	Reviews non-invasive neuromodulation for cognitive function improvement.
Pekdemir et al., 2024	USA	Review	Not specified	Not specified	Not specified	Mechanisms and benefits of neuroprotective agents	Reviews mechanisms and benefits of neuroprotective agents in neurological health.
Dong et al., 2023	China	Systematic review	Patients with DOC	Not specified	Hospitals	Vagus nerve stimulation for DOC patients	Explores the therapeutic effects of vagus nerve stimulation for DOC patients.
Tekmyster et al., 2023	USA	Review	Spinal cord stimulator patients	Not specified	Hospitals	Physical therapy after spinal cord stimulator implantation	Discusses physical therapy considerations post spinal cord stimulator implantation.
Lim et al., 2021	China	Bibliometric review	Studies in Traditional Chinese Medicine	Not specified	Not specified	Trends in machine learning in TCM	Reviews machine learning applications in Traditional Chinese Medicine research.
Yan et al., 2015	China	Review	Hyperbaric oxygen therapy studies	Not specified	Hospitals	Hyperbaric oxygen therapy in China	Reviews the application of hyperbaric oxygen therapy in China.
Lam et al., 2017	USA	Review	Hyperbaric oxygen therapy studies	Not specified	Clinical settings	Clinical evidence for hyperbaric oxygen therapy	Reviews the clinical evidence for hyperbaric oxygen therapy.
Grim et al., 1990	USA	Review	Not specified	Not specified	Hospitals	Hyperbaric oxygen therapy applications	Reviews applications of hyperbaric oxygen therapy.
Huang & Obenaus, 2011	USA	Review	Traumatic brain injury patients	Not specified	Hospitals	Hyperbaric oxygen therapy for TBI	Reviews hyperbaric oxygen therapy as a treatment for traumatic brain injury.
Kalani et al., 2002	Sweden	Longitudinal study	Diabetic foot ulcer patients	Not specified	Hospitals	HBO therapy for diabetic foot ulcers	Studies the long-term effects of HBO therapy for diabetic foot ulcers.
Weaver et al., 2002	USA	Randomized clinical trial	Carbon monoxide poisoning patients	Not specified	Hospitals	HBO therapy for acute carbon monoxide poisoning	Demonstrates the efficacy of HBO therapy in treating acute CO poisoning.
DONG et al., 2019	China	Clinical study	Acute cerebral infarction patients	Not specified	Hospitals	HBO therapy for acute cerebral infarction	Explores the therapeutic effect of HBO on cerebral infarction and neurological function.
Rockswold et al., 2013	USA	Phase II clinical trial	Severe TBI patients	Randomized	Hospitals	HBO therapy combined with normobaric hyperoxia for TBI	Evaluates combined HBO and normobaric hyperoxia on TBI outcomes.
Ortega et al., 2021	Spain	Review	Not specified	Not specified	Not specified	Overview on HBO therapy	Reviews the applications, mechanisms, and translational opportunities of HBO therapy.
McDonagh et al., 2004	USA	Systematic review	TBI patients	Not specified	Hospitals	HBO therapy for TBI	Reviews the evidence supporting HBO therapy for traumatic brain injury.
Efrati et al., 2013	Israel	Randomized clinical trial	Stroke patients	Randomized	Hospitals	HBO therapy for post-stroke neuroplasticity	Demonstrates HBO therapy’s effects on neuroplasticity in post-stroke patients.
Jain & Baydin, 2017	USA	Textbook	Medical professionals	Not applicable	Not applicable	Textbook on hyperbaric medicine	Provides a comprehensive guide on hyperbaric medicine applications.
Pistarini & Maggioni, 2018	Italy	Review	Patients with DOC	Not specified	Rehabilitation centers	Early rehabilitation of DOC patients	Reviews early rehabilitation strategies for DOC patients.
Seel et al., 2013	USA	Retrospective study	Patients with DOC	Not specified	Rehabilitation centers	Early treatment for DOC patients	Examines specialized early treatment programs for DOC patients.
Zemková & Kováčiková, 2023	Slovakia	Review	Athletes	Not specified	Not specified	Training-induced adaptations in postural control	Reviews sport-specific adaptations in postural control and their impact on performance.
Zahia et al., 2020	Spain	Systematic review	Pressure injury patients	Not specified	Not specified	Machine learning in pressure injury analysis	Reviews machine learning techniques for analyzing pressure injuries.
McLendon et al., 2017	USA	Review	Patients with DVT risk factors	Not specified	Not specified	Deep venous thrombosis risk factors	Reviews risk factors associated with deep venous thrombosis.
Boussi-Gross et al., 2013	Israel	Randomized clinical trial	Mild TBI patients	Randomized	Hospitals	HBO therapy for post-concussion syndrome	Shows the effectiveness of HBO therapy for post-concussion syndrome.
Saxon et al., 2021	USA	Review	Aging populations	Not specified	Not specified	Aging and physical changes in older adults	Reviews physical changes and their management in aging populations.
Zhang et al., 2021	Not specified	Review	Persons with disorders of consciousness	Not specified	Not specified	Spasticity management in persons with disorders of consciousness	Discusses strategies for managing spasticity in patients with disorders of consciousness.
Martens et al., 2017	Not specified	Review	Persons with disorders of consciousness	Not specified	Not specified	Spasticity management in disorders of consciousness	Reviews spasticity management strategies in patients with disorders of consciousness.
Maas et al., 2008	Not specified	Systematic Review	Adults with moderate and severe TBI	Not specified	Hospitals	Management of moderate and severe traumatic brain injury	Discusses the management of moderate and severe traumatic brain injuries in adults.
Laurent et al., 2016	Not specified	Systematic Review	ICU patients	Not specified	ICU	Early exercise in intensive care	Reviews the role of early exercise in intensive care settings.
McDonnell et al., 2011	Not specified	Systematic Review	Adults with neurological disorders	Not specified	Not specified	Aerobic exercise for cognitive function in neurological disorders	Reviews the effects of aerobic exercise on cognitive function in adults with neurological disorders.
Muller & Meyerhoff, 2021	Not specified	Longitudinal Study	Patients with alcohol use disorder	Not specified	Not specified	Brain organization and future relapse prediction	Studies maladaptive brain organization as an indicator for future relapse in alcohol use disorder.
Sahin et al., 2012	Turkey	Randomized Controlled Trial	Post-stroke patients with spasticity	Randomized	Hospitals	Efficacy of electrical stimulation for post-stroke spasticity	Evaluates the efficacy of electrical stimulation in reducing post-stroke spasticity.
Regan et al., 2009	Canada	Systematic Review	Spinal cord injury patients with pressure ulcers	Not specified	Hospitals	Therapeutic interventions for pressure ulcers after spinal cord injury	Reviews interventions for pressure ulcers in spinal cord injury patients.
DeJong et al., 2014	USA	Cohort Study	Spinal cord injury patients	Not specified	Rehabilitation centers	Factors associated with pressure ulcer risk in spinal cord injury	Identifies factors associated with pressure ulcer risk in spinal cord injury rehabilitation.
Singh et al., 2020	Not specified	Review	Pediatric brain injury patients	Not specified	Not specified	Autonomic dysregulation in pediatric brain injury	Reviews autonomic dysregulation in pediatric brain injury, with implications for Rett syndrome.
Jöhr et al., 2020	Not specified	Cohort Study	Severe brain injury patients	Not specified	Hospitals	Cognitive motor dissociation recovery after severe brain injury	Investigates recovery from cognitive motor dissociation in severe brain injury patients.
Zasler et al., 2012	Not specified	Textbook	Brain injury patients	Not specified	Not specified	Brain injury medicine principles	Comprehensive guide on brain injury medicine.
Langan & Lin, 2023	Not specified	Case-based Approach	Brain injury-related spasticity patients	Not specified	Not specified	Brain injury-related spasticity management	Reviews spasticity management in brain injury cases.
Lombardi et al., 2010	Not specified	Systematic Review	Coma or vegetative state patients	Not specified	Not specified	Sensory stimulation for brain-injured individuals	Reviews sensory stimulation for brain-injured individuals in coma or vegetative state.
Katz & Association, 2011	Not specified	Textbook	Brain injury patients	Not specified	Not specified	Cognition, occupation, and participation in neurorehabilitation	Explores cognition, occupation, and participation in neurorehabilitation.
Aida et al., 2018	Not specified	Literature Review	Traumatic brain injury rehabilitation patients	Not specified	Rehabilitation centers	Immersive virtual reality in TBI rehabilitation	Reviews the use of immersive virtual reality in traumatic brain injury rehabilitation.
Giacino, 2005	USA	Book Chapter	Patients with disorders of consciousness	Not specified	Rehabilitation centers	Rehabilitation of patients with disorders of consciousness	Provides rehabilitation strategies for patients with disorders of consciousness.
Wilson et al., 2017	Not specified	Textbook	Patients in neuropsychological rehabilitation	Not specified	Not specified	Neuropsychological rehabilitation	Discusses neuropsychological rehabilitation for various brain injuries.
Wijdicks & Kramer, 2017	Not specified	Textbook	Neurocritical care patients	Not specified	Neurocritical care units	Neurocritical care practices	Comprehensive guide on neurocritical care.
Furl, 2024	Not specified	Review	Patients with disorders of consciousness	Not specified	Not specified	Occupational therapy for patients with disorders of consciousness	Reviews occupational therapy interventions for patients with disorders of consciousness.
Galea, 2012	Not specified	Review	Neurological dysfunction patients	Not specified	Clinical settings	Physical modalities in neurological dysfunction treatment	Reviews physical modalities used in treating neurological dysfunction.
Evancho et al., 2023	Not specified	Review	Neurorehabilitation patients	Not specified	Rehabilitation centers	Combined neuromodulation and physical therapy for neurorehabilitation	Discusses combined neuromodulation and physical therapy for neurorehabilitation.
Nitsche & Paulus, 2000	Not specified	Experimental Study	Healthy individuals	Not specified	Laboratory	Effects of transcranial direct current stimulation on motor cortex excitability	Investigates excitability changes in the human motor cortex induced by transcranial direct current stimulation (tDCS).
Antal & Paulus, 2013	Not specified	Review	Not specified	Not specified	Not specified	Transcranial alternating current stimulation (tACS)	Reviews the effects of transcranial alternating current stimulation (tACS).
Kuo et al., 2014	Not specified	Review	Neuropsychiatric disease patients	Not specified	Not specified	Effects of non-invasive brain stimulation in neuropsychiatric diseases	Reviews therapeutic effects of non-invasive brain stimulation in neuropsychiatric diseases.
Brunoni et al., 2018	Brazil	Review	Psychiatric disorder patients	Not specified	Not specified	Non-invasive brain stimulation in psychiatric disorders	Provides an overview of non-invasive brain stimulation in psychiatric disorders.
Chen et al., 2020	Not specified	Systematic Review	Depressed patients	Not specified	Not specified	Repetitive transcranial magnetic stimulation (rTMS) in depression	Reviews high-frequency repetitive transcranial magnetic stimulation in depression treatment.
Taye, 2024	Not specified	Review	Neurorehabilitation patients	Not specified	Not specified	Evolution of neurological physical therapy	Reviews the advancements in neurological physical therapy.
Bradt & Dileo, 2014	Not specified	Systematic Review	Mechanically ventilated patients	Not specified	Hospitals	Music interventions for mechanically ventilated patients	Reviews the use of music interventions for mechanically ventilated patients.
Jia et al., 2016	Japan	Experimental Study	Healthy adults	Not specified	Laboratory	Music attenuates parasympathetic nervous system decrease after exercise	Shows that music attenuates parasympathetic nervous system activity decrease post-exercise.
Schumacher, 2014	Not specified	Review	Individuals with pervasive developmental disorders	Not specified	Not specified	Music therapy for pervasive developmental disorders	Reviews the use of music therapy in individuals with pervasive developmental disorders, including autism.
Pakdeesatitwara N, Tamplin J, 2018	Australia	Survey	Music therapy practitioners	International survey	Neurorehabilitation	Explore the use of music therapy services in neurorehabilitation	Identified the global availability and types of music therapy services in neurorehabilitation
Lee B, Leem J, Kim H, Jo H-G, Kwon C-Y, 2020	South Korea	Systematic Review & Meta-analysis	10 RCTs	Randomized controlled trials	Neurorehabilitation	Evaluate the effectiveness of herbal medicine in traumatic brain injury	Herbal medicine showed potential in improving neurological outcomes in traumatic brain injury
Rabinstein AA, Shulman LM, 2003	USA	Review	Not applicable	Literature review	Clinical neurology	Discuss the role of acupuncture in neurological disorders	Acupuncture is suggested as a potential treatment for various neurological disorders
Zhang J-h, Wang D, Liu M, 2013	China	Systematic Review & Meta-analysis	14 studies	Systematic review	Stroke rehabilitation	Evaluate acupuncture efficacy for stroke rehabilitation	Acupuncture demonstrated positive effects on stroke recovery, though further research is needed
Hu G-t, Wang Y, 2021	China	Review	Not applicable	Literature review	Mental health	Review Chinese medicine treatments for post-traumatic stress disorder (PTSD)	Chinese medicine may provide a promising treatment for PTSD, with various therapies showing benefits
Ren J-J, Tian H-C, Wang Y-F, Li Y-T, Xu Q, Tian L, 2022	China	Systematic Review & Meta-analysis	6 studies	Randomized controlled trials	Post-stroke care	Investigate the effectiveness and safety of moxibustion for poststroke insomnia	Moxibustion is effective and safe for treating poststroke insomnia
Tan L, Zeng L, Wang N, Deng M, Chen Y, Ma T, Zhang L, Xu Z, 2019	China	Systematic Review & Meta-analysis	8 studies	Randomized controlled trials	Brain injury recovery	Assess the effectiveness of acupuncture in promoting recovery of disorder of consciousness after traumatic brain injury	Acupuncture promotes recovery of consciousness in patients with traumatic brain injury
Lee B, Leem J, Kim H, Jo H-G, Yoon S-H, Shin A, Sul J-U, Choi Y-Y, Yun Y, Kwon C-Y, 2019	South Korea	Protocol for Systematic Review	Not applicable	Protocol	Traumatic brain injury management	Develop a systematic review protocol for evaluating herbal medicine in acute management and rehabilitation of traumatic brain injury	A systematic review protocol for assessing herbal treatments in traumatic brain injury
Wei C, Wang J, Yu J, Tang Q, Liu X, Zhang Y, Cui D, Zhu Y, Mei Y, Wang Y, 2023	China	Review	Not applicable	Literature review	Traumatic brain injury treatment	Explore the potential of combining modern agents and traditional Chinese medicine for treating traumatic brain injury	Traditional Chinese medicine combined with modern agents could enhance recovery after traumatic brain injury
Panahi Y, Rajaee SM, Johnston TP, Sahebkar A, 2019	Iran	Literature Review	Not applicable	Literature review	Neurodegenerative disorders	Review the neuroprotective effects of antioxidants in managing neurodegenerative disorders	Antioxidants show promise in protecting against neurodegenerative diseases
Ye Q-Y, Lin Q, Hu X-L, Yang Y-M, Zheng B-L, Li T, Zhong W-Q, Wang H-Y, Zhang Z-F, Luo B-J, 2023	China	Prospective Cohort Study	500 participants	Multicenter cohort study	Osteoarthritis	Evaluate combined Chinese and Western medicine for knee osteoarthritis	Combined Chinese and Western medicine proved effective and safe for knee osteoarthritis
Liu B-G, Xie M, Dong Y, Wu H, He D-D, Hu G-Z, Xu E-P, 2022	China	Narrative Review	Not applicable	Literature review	Microbial resistance	Examine antimicrobial mechanisms of traditional Chinese medicine and reversal of drug resistance	Traditional Chinese medicine shows potential for overcoming microbial resistance
Giacino JT, Whyte J, Bagiella E, Kalmar K, Childs N, Khademi A, Eifert B, Long D, Katz DI, Cho S, 2012	USA	Placebo-controlled trial	184 patients	Randomized controlled trial	Traumatic brain injury	Assess the efficacy of amantadine for severe traumatic brain injury	Amantadine was found to improve recovery in severe traumatic brain injury
Meythaler JM, Brunner RC, Johnson A, Novack TA, 2002	USA	Pilot randomized trial	50 patients	Randomized controlled trial	Traumatic brain injury	Investigate amantadine's role in neurorecovery for traumatic brain injury	Amantadine demonstrated potential in improving recovery from diffuse axonal injury
Peppel LD, Ribbers GM, Heijenbrok-Kal MH, 2020	Netherlands	Systematic Review & Meta-analysis	15 studies	Randomized controlled trials	Traumatic brain injury	Investigate pharmacological and non-pharmacological interventions for depression after brain injury	Pharmacological and non-pharmacological treatments were both effective for depression post-TBI
Sawangjit R, Thongphui S, Chaichompu W, Phumart P, 2020	Thailand	Systematic Review & Meta-analysis	10 RCTs	Randomized controlled trials	Peripheral neuropathy	Evaluate the efficacy and safety of mecobalamin for peripheral neuropathy	Mecobalamin showed significant benefits in managing peripheral neuropathy
Onose G, Daia-Chendreanu C, Haras M, Ciurea A, Anghelescu A, 2011	Romania	Review	Not applicable	Literature review	Traumatic brain injury	Review advances in neuroprotection and recovery for traumatic brain injury	Discussed ongoing efforts in improving neuroprotection for TBI recovery
Salman GF, Mosier MC, Beasley BW, Calkins DR, 2003	USA	Meta-analysis	22 studies	Randomized controlled trials	Chronic obstructive pulmonary disease	Evaluate rehabilitation effectiveness for COPD	Rehabilitation programs effectively improve outcomes for COPD patients
Osadnik CR, Rodrigues FM, Camillo CA, Loeckx M, Janssens W, Dooms C, Troosters T, 2015	Belgium	Review	Not applicable	Literature review	Pulmonary rehabilitation	Review principles of rehabilitation for patients with pulmonary disease	Highlighted core principles for effective pulmonary rehabilitation
Xu C, Yang F, Wang Q, Gao W, 2024	China	Systematic Review & Meta-analysis	15 studies	Network meta-analysis	Intensive care	Investigate neuromuscular electrical stimulation for critically ill patients	Found neuromuscular electrical stimulation to improve recovery in mechanically ventilated patients
Mary P, Servais L, Vialle R, 2018	France	Review	Not applicable	Literature review	Neuromuscular diseases	Discuss diagnosis and management of neuromuscular diseases	Overview of best practices in diagnosing and treating neuromuscular diseases
McNamara RJ, Dale M, McKeough ZJ, 2019	Australia	Review	Not applicable	Literature review	Pulmonary rehabilitation	Investigate strategies for increasing engagement in pulmonary rehabilitation	Discussed innovative strategies to improve engagement in pulmonary rehab
Alhashemi HH, 2010	Saudi Arabia	Review	Not applicable	Literature review	Dysphagia	Review dysphagia in severe traumatic brain injury patients	Reviewed the prevalence and management of dysphagia post-TBI
Sharma OP, Oswanski MF, Singer D, Buckley B, Courtright B, Raj SS, Waite PJ, Tatchell T, Gandaio A, 2007	USA	Review	Not applicable	Literature review	Trauma care	Investigate swallowing disorders and the impact of tracheostomy	Found that tracheostomy patients experience significant swallowing difficulties
Bhattacharyya N, 2014	USA	Cross-sectional study	148,000 adults	National survey	Dysphagia	Assess prevalence of dysphagia in adults	Found a high prevalence of dysphagia among adults in the US
Yang Y, Xu J, Sang T-T, Wang H-Y, 2022	China	Review	Not applicable	Literature review	Dysphagia management	Review thickeners for dysphagic patients	Discussed starch and gum-based thickeners for dysphagic patients
Ni X-x, Nie J, Xie Q-y, Yu R-h, Su L, Liu Z-f, 2020	China	Experimental Study	40 rats	Animal study	Brain injury	Evaluate hyperbaric oxygen therapy for brain injury	Hyperbaric oxygen therapy protected against brain injury in heatstroke rats
Torii T, Sato A, Nakahara Y, Iwahashi M, Itoh Y, Iramina K, 2012	Japan	Experimental Study	Not applicable	Experimental study	Brain stimulation	Investigate frequency-dependent effects of repetitive transcranial magnetic stimulation	Identified frequency-dependent effects of rTMS on the brain
Hallett M, 2000	USA	Review	Not applicable	Literature review	Transcranial magnetic stimulation	Discuss the use of transcranial magnetic stimulation in neurological research	Summarized the mechanisms and applications of TMS in studying the human brain
Lefaucheur J-P, Antal A, Ayache SS, Benninger DH, Brunelin J, Cogiamanian F, Cotelli M, De Ridder D, Ferrucci R, Langguth B, 2017	International	Guideline Review	Not applicable	Evidence-based guidelines	Clinical neurophysiology	Provide guidelines for the therapeutic use of transcranial direct current stimulation (tDCS)	tDCS is effective for various neurological and psychiatric conditions, with safety and efficacy guidelines provided
Guerra A, Maria Costantini E, Maatta S, Ponzo D, Ferreri F, 2014	Italy	Literature Review	Not applicable	Literature review	Disorders of consciousness	Review electrophysiological treatment strategies for disorders of consciousness	Highlighted potential treatments including tDCS and other neuromodulation techniques for consciousness disorders
Feller D, Vinante C, Trentin F, Innocenti T, 2021	Italy	Systematic Review	Not applicable	Systematic review	Disorders of consciousness	Evaluate the effectiveness of median nerve electrical stimulation for consciousness disorders	Median nerve stimulation shows potential in improving outcomes for patients with disorders of consciousness
Bremner JD, Wittbrodt MT, Gurel NZ, Shandhi MMH, Gazi AH, Park J, Inan OT, 2023	USA	Book Chapter	Not applicable	Book chapter	Trauma spectrum psychiatric disorders	Review the effects of transcutaneous vagal nerve stimulation in trauma spectrum psychiatric disorders	Transcutaneous vagal nerve stimulation has therapeutic potential for psychiatric trauma-related conditions
Si J, Dang Y, Zhang Y, Li Y, Zhang W, Yang Y, Cui Y, Lou X, He J, Jiang T, 2018	China	Experimental Study	20 patients	Clinical study	Disorders of consciousness	Study the impact of spinal cord stimulation frequency on hemodynamic response	Frequency of spinal cord stimulation affects hemodynamic response in patients with disorders of consciousness
Giacino JT, Ashwal S, Childs N, Cranford R, Jennett B, Katz DI, Kelly JP, Rosenberg JH, Whyte J, Zafonte RD, 2002	USA	Consensus Statement	Not applicable	Consensus guidelines	Disorders of consciousness	Define and establish diagnostic criteria for the minimally conscious state	Established formal definition and diagnostic criteria for minimally conscious state
Bender A, Jox RJ, Grill E, Straube A, Lulé D, 2015	Germany	Systematic Review & Meta-analysis	Not applicable	Systematic review	Disorders of consciousness	Review diagnostic procedures for persistent vegetative and minimally conscious states	Provided an overview of diagnostic tools for vegetative and minimally conscious states
Riganello F, Cortese M, Arcuri F, Candelieri A, Guglielmino F, Dolce G, Sannita W, Schnakers C, 2015	Italy	Experimental Study	30 patients	Clinical study	Disorders of consciousness	Evaluate the reliability of the Nociception Coma Scale	Nociception Coma Scale proved reliable for assessing consciousness in patients with disorders of consciousness
Rakkolainen I, Farooq A, Kangas J, Hakulinen J, Rantala J, Turunen M, Raisamo R, 2021	Finland	Scoping Review	Not applicable	Scoping review	Extended reality	Investigate technologies for multimodal interaction in extended reality	Reviewed technologies enabling multimodal interaction for immersive experiences in extended reality
Casado‐Aranda LA, Sánchez‐Fernández J, Bigne E, Smidts A, 2023	Spain	Literature Review	Not applicable	Literature review	Neuromarketing	Review neuromarketing tools and trends in communication research	Analyzed how neuromarketing tools are applied in communication studies, highlighting trends and advancements
Wolf A, Ueda K, 2021	Japan	Review	Not applicable	Literature review	Cognitive impairments	Investigate eye-tracking techniques to study cognitive impairments	Eye-tracking methods have proven effective in assessing cognitive impairments in clinical populations
Houssein EH, Hammad A, Ali AA, 2022	Egypt	Review	Not applicable	Literature review	Brain-computer interfaces	Review EEG-based brain-computer interface for emotion recognition	EEG-based brain-computer interfaces offer promising solutions for emotion recognition using machine learning techniques
